# Supplementary material for: Circulating myeloid-derived MMP8 in stress susceptibility and depression
Source: Springer Nature journal article supplement (doi:10.1038/s41586-023-07015-2), 2024-02-07

---

**Supplementary information**

---

**Circulating myeloid-derived MMP8 in stress susceptibility and depression**

---

In the format provided by the  
authors and unedited

Aggrecan

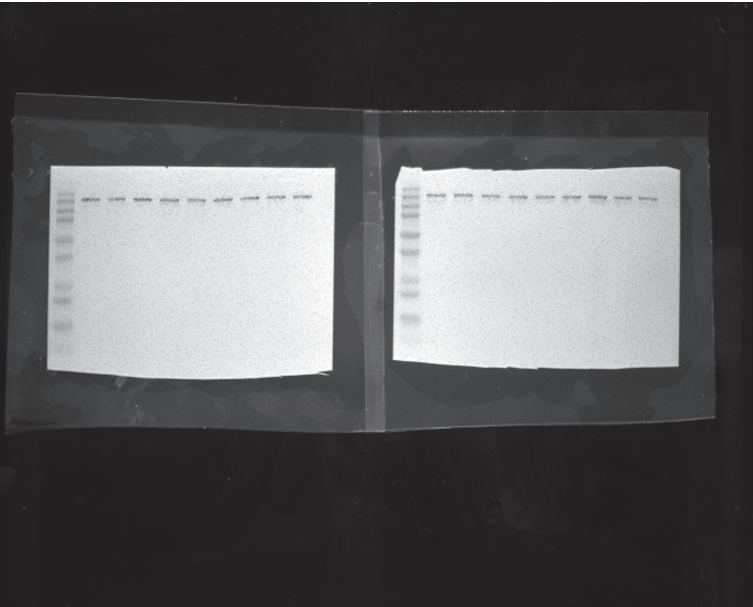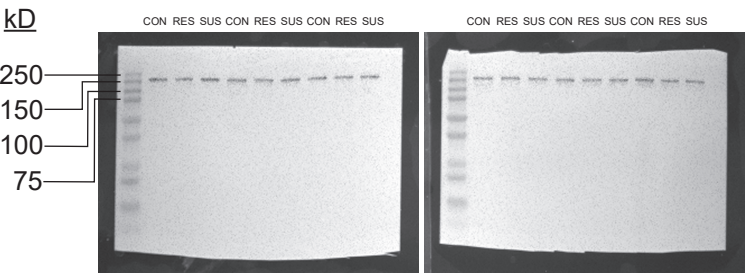

$\beta$ -Actin

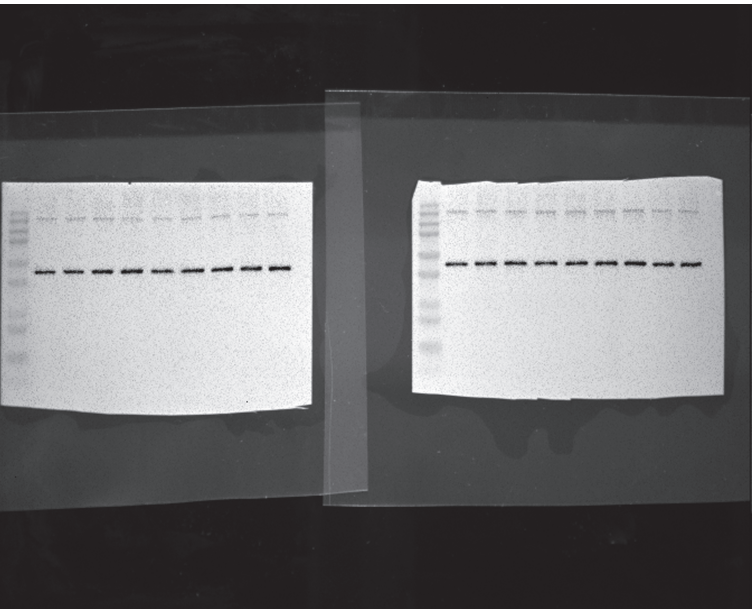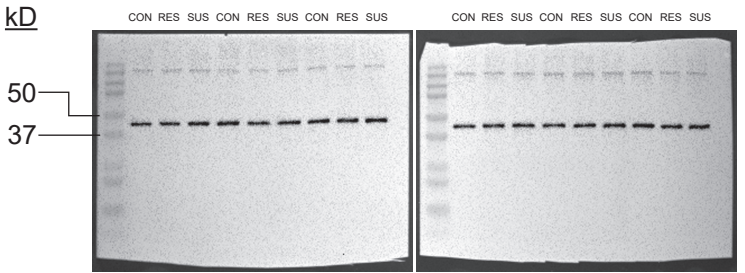

Supplement: MOESM1 [file 41586_2023_7015_MOESM1_ESM.pdf]
